# Supplementary material for: Diacylglyceryl-N,N,N-trimethylhomoserine-dependent lipid remodeling in a green alga, Chlorella kessleri
Source: PubMed Central journal article supplement (PMC8752610; doi:10.1038/s42003-021-02927-z), 2022-01-11
Supplement: 42003_2021_2927_MOESM2_ESM.pdf [file 42003_2021_2927_MOESM2_ESM.pdf]

## Description of Additional Supplementary Files

**File name:** Supplementary Data 1.

**Description:** Source data for all figures, including supplementary ones.
